# Supplementary material for: Synthesis, characterization and corrosion inhibition potential of two novel Schiff bases on mild steel in acidic medium
Source: Royal Society of Chemistry journal article supplement (doi:10.1039/c7ra08887f), 2017-01-01
Supplement: c7ra08887f1.pdf [file c7ra08887f1.pdf]

# Synthesis, characterization and corrosion inhibition potential of two novel Schiff bases on mild steel in acidic medium

Archana Pandey<sup>a,\*</sup>, B. Singh<sup>a</sup>, Chandrabhan Verma<sup>b,c</sup>, Eno E. Ebenso<sup>b,c,\*</sup>

<sup>a</sup>Department of Chemistry, Centre of Advance Study, Institute of Science, Banaras Hindu University, Varanasi- 221005, India.

<sup>b</sup>Department of Chemistry, School of Chemical and Physical Sciences, Faculty of Natural and Agricultural Sciences, North-West University, Private Bag X2046, Mmabatho 2735, South Africa

<sup>c</sup>Material Science Innovation & Modelling (MaSIM) Research Focus Area, Faculty of Natural and Agricultural Sciences, North-West University, Private Bag X2046, Mmabatho 2735, South Africa

\*Corresponding Authors: archana.pandey2504@gmail.com; Eno.Ebenso@nwu.ac.za

## <sup>1</sup>H and <sup>13</sup>C NMR spectra of synthesized SBs:

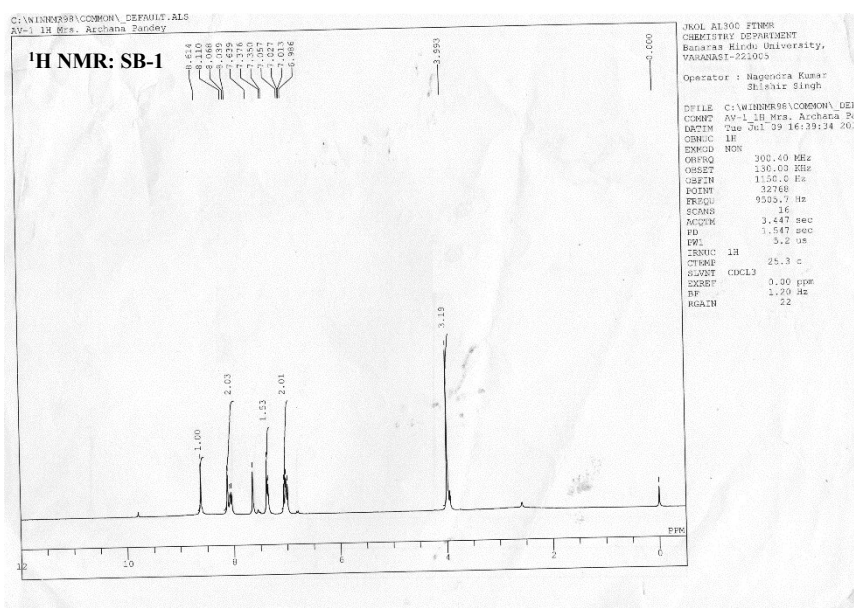

W:\NMR98\Data\AV2\_13C1BCM\_E2.als  
 2\_13C Mrs. Archana Pandey

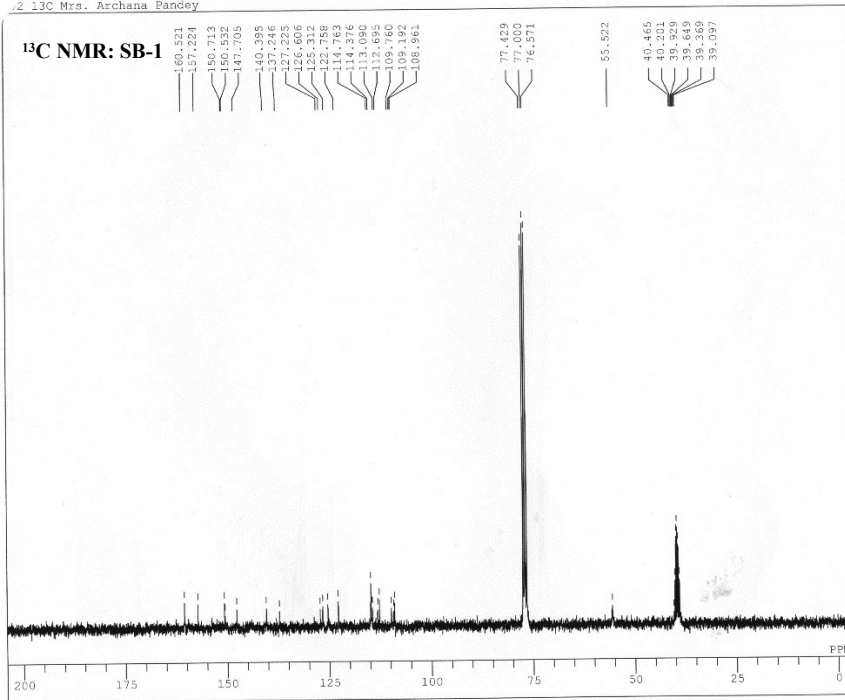

C:\WINNMR98\Data\HMC\_13C2NON\_E3.ALS  
 HMC\_13C Mrs. Archana Pandey

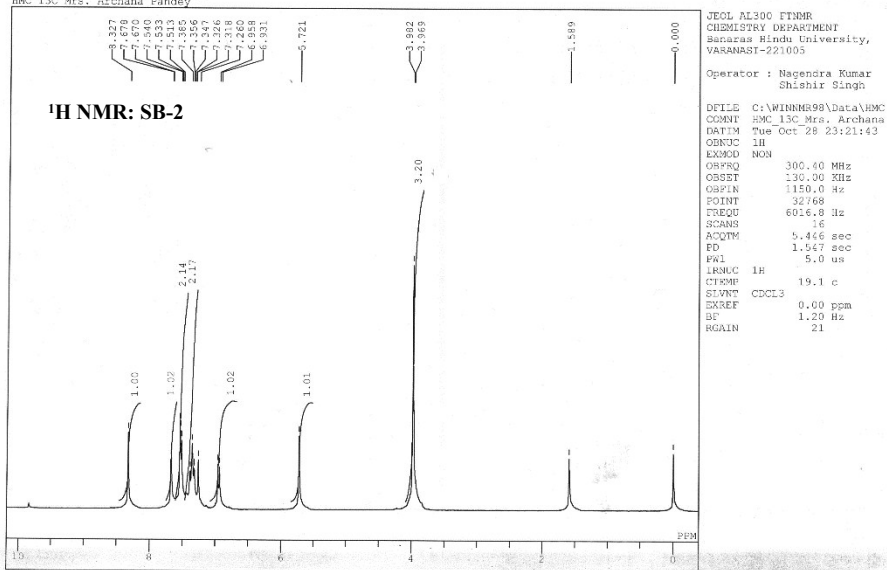

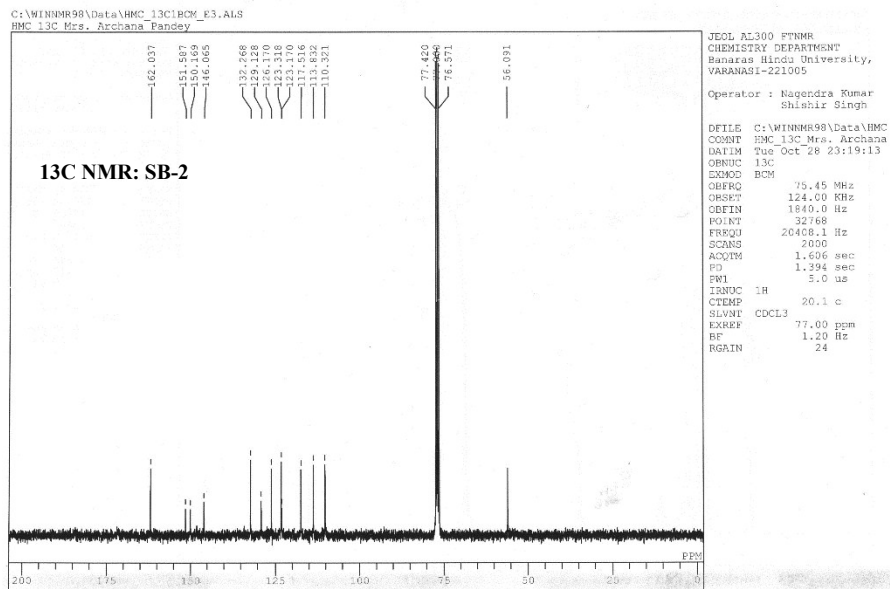

**Fig. S1:**  $^1\text{H}$  and  $^{13}\text{C}$  NMR spectra of synthesized SBs.
